# Supplementary material
Source: Springer Nature journal article supplement (https://www.springermedizin.de/resource/supplementary/13229_2013_104_MOESM2_ESM.pdf/9676190)

a

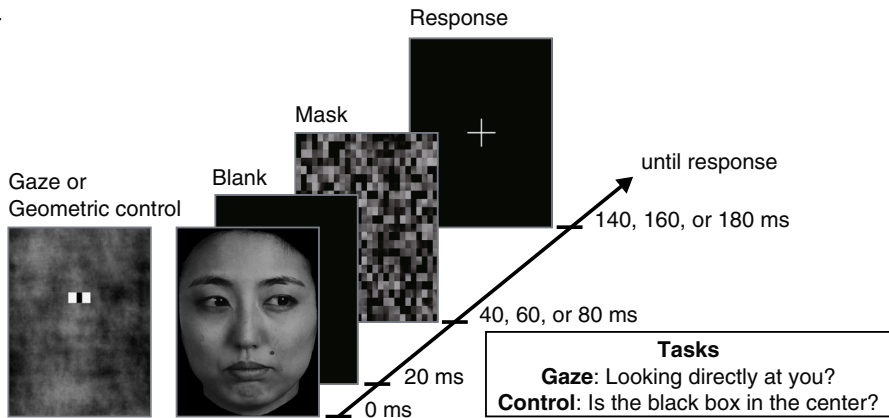

b

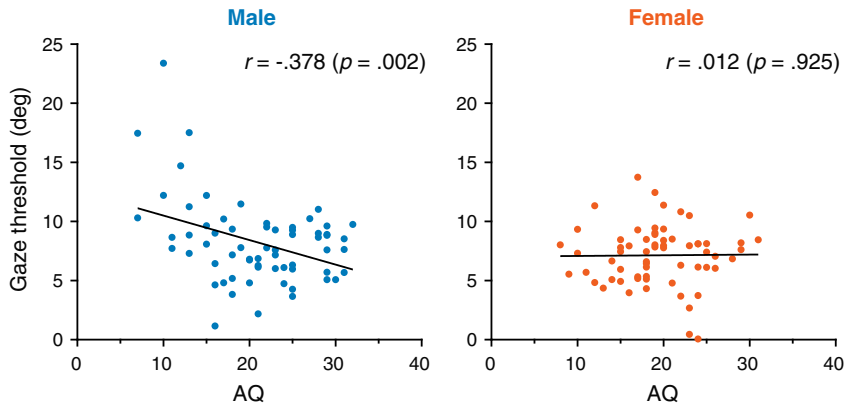

Supplement: MOESM2 [file 9676190]
